# Supplementary material for: Survival for waitlisted kidney failure patients receiving transplantation versus remaining on waiting list: systematic review and meta-analysis
Source: PubMed Central journal article supplement (PMC8886447; doi:10.1136/bmj-2021-068769), 2022-03-01
Supplement: chad068769.ww1.pdf [file chad068769.ww1.pdf]

## **Supplementary Table A. Detailed Search Methodology**

### **Search methods**

The databases Medline (via Ovid), Embase (via Ovid), Cochrane Library (including the Central Registry of Controlled Trials), and Web of Science (Core Collection) were searched from inception to March 2021 (01/03/2021). They were searched using a mixture of free text terms, and thesaurus terms (when available). Search syntax was adapted to code for the individual database platforms. See the Appendix for the exact search terms used in each database.

### **Results**

| Database                         | Results                      |
|----------------------------------|------------------------------|
| Medline via Ovid                 | 137                          |
| Embase via Ovid                  | 190                          |
| Cochrane (including Central)     | 51 (of which 41 were trials) |
| Web of Science (Core Collection) | 463                          |

After deduplication: 699 unique results

### **Appendix: exact search terms used in each database**

#### **Medline via Ovid**

1. Chronic kidney disease.tw,ab,kw.
2. Chronic kidney failure.tw,ab,kw.
3. Chronic Kidney Insufficien\$.tw,ab,kw.
4. Chronic Nephropathy.tw,ab,kw.
5. Chronic Renal Disease.tw,ab,kw.
6. Chronic renal failure.tw,ab,kw.
7. CRF.tw,ab,kw.
8. Chronic Renal Insufficien\$.tw,ab,kw.
9. End-stage renal disease.tw,ab,kw.
10. End-stage renal failure.tw,ab,kw.
11. End-stage kidney disease.tw,ab,kw.
12. End-stage kidney failure.tw,ab,kw.
13. ESRD.tw,ab,kw.
14. ESRF.tw,ab,kw.
15. Kidney Chronic Failure.tw,ab,kw.
16. Kidney Failure, Chronic/
17. Kidney Insufficien\$.tw,ab,kw.
18. Kidney failure.tw,ab,kw. or Renal Insufficiency
19. Renal Insufficiency, Chronic/
20. Terminal Kidney Failure.tw,ab,kw.
21. Kidney\$ Allograft\$.tw,ab,kw.
22. Kidney Transplantation/
23. ((kidney\$ or renal) adj5 (transplant\$ or graft\$ or donor\$ or recipient\$ or replac\$ or artificial\$ or extracorporeal\$)).tw,ab,kw.
24. Hemofiltration/
25. Hemofiltrat\$.tw,ab,kw.
26. Kidneys, Artificial/
27. kidney dialy\$.tw,ab,kw.

28. Kidney\$ replacement therap\$.tw,ab,kw.
29. Peritoneal Dialysis/
30. predialy\$.tw,ab,kw.
31. pre-dialy\$.tw,ab,kw.
32. exp Renal Dialysis/
33. Renal Replacement Therapy/
34. Ultrafiltration/
35. ultrafiltrat\$.tw,ab,kw.
36. wait-listed.tw,ab,kw.
37. wait listed.tw,ab,kw.
38. waiting listed.tw,ab,kw.
39. patient listed.tw,ab,kw.
40. Waiting Lists/
41. Transplant list.tw,ab,kw.
42. death.tw,ab,kw.
43. mortality.tw,ab,kw.
44. exp Mortality/
45. "survival analysis".tw,ab,kw.
46. Survival Analysis/
47. Survival Rate/
48. 1 or 2 or 3 or 4 or 5 or 6 or 7 or 8 or 9 or 10 or 11 or 12 or 13 or 14 or 15 or 16 or 17 or 18 or 19 or 20
49. 21 or 22 or 23
50. 24 or 25 or 26 or 27 or 28 or 29 or 30 or 31 or 32 or 33 or 34 or 35
51. 36 or 37 or 38 or 39 or 40 or 41
52. 42 or 43 or 44 or 45 or 46 or 47
53. 48 and 49 and 50 and 51 and 52

#### **Embase via Ovid**

1. chronic kidney disease.tw,ab,kw.
2. Chronic kidney failure.tw,ab,kw.
3. chronic kidney failure/
4. Chronic Kidney Insufficien\$.tw,ab,kw.
5. Chronic Nephropathy.tw,ab,kw.
6. Chronic Renal Disease.tw,ab,kw.
7. Chronic renal failure.tw,ab,kw.
8. CRF.tw,ab,kw.
9. Chronic Renal Insufficien\$.tw,ab,kw.
10. End-stage renal disease.tw,ab,kw.
11. End-stage renal failure.tw,ab,kw.
12. End-stage kidney disease.tw,ab,kw.
13. End-stage kidney failure.tw,ab,kw.
14. ESRD.tw,ab,kw.
15. ESRF.tw,ab,kw.
16. Kidney Chronic Failure.tw,ab,kw.
17. chronic kidney failure/
18. Kidney Insufficien\$.tw,ab,kw.
19. Renal insufficiency.tw,ab,kw.
20. Terminal Kidney Failure.tw,ab,kw.
21. kidney failure/
22. kidney allograft/

23. kidney transplantation/
24. ((kidney\$ or renal) adj5 (transplant\$ or graft\$ or donor\$ or recipient\$ or replac\$ or artificial\$ or extracorpeal\$)).tw,ab,kw.
25. hemofiltration/
26. Hemofiltrat\$.tw,ab,kw.
27. artificial kidney.tw,ab,kw.
28. kidney dialy\$.tw,ab,kw.
29. Kidney\$ replacement therap\$.tw,ab,kw.
30. peritoneal dialysis/
31. predialy\$.tw,ab,kw.
32. pre-dialy\$.tw,ab,kw.
33. hemodialysis/
34. Renal dialysis.tw,ab,kw.
35. renal replacement therapy/
36. ultrafiltration/
37. ultrafiltrat\$.tw,ab,kw.
38. wait-listed.tw,ab,kw.
39. wait listed.tw,ab,kw.
40. waiting listed.tw,ab,kw.
41. patient listed.tw,ab,kw.
42. waiting list.tw,ab,kw.
43. Transplant list.tw,ab,kw.
44. death/
45. death.tw,ab,kw.
46. mortality/
47. mortality.tw,ab,kw.
48. "survival analysis".tw,ab,kw.
49. survival analysis/
50. survival rate/
51. 1 or 2 or 3 or 4 or 5 or 6 or 7 or 8 or 9 or 10 or 11 or 12 or 13 or 14 or 15 or 16 or 17 or 18 or 19 or 20 or 21
52. 22 or 23 or 24
53. 25 or 26 or 27 or 28 or 29 or 30 or 31 or 32 or 33 or 34 or 35 or 36 or 37
54. 38 or 39 or 40 or 41 or 42 or 43
55. 44 or 45 or 46 or 47 or 48 or 49 or 50
56. 51 and 52 and 53 and 54 and 55

### **Cochrane Library (including the Cochrane Central Register of Controlled Trials)**

1. (Chronic kidney disease OR Chronic kidney failure OR Chronic Kidney Insufficien\* OR Chronic Nephropathy OR Chronic Renal Disease OR Chronic renal failure OR CRF OR Chronic Renal Insufficien\* OR End-stage renal disease OR End-stage renal failure OR End-stage kidney disease OR End-stage kidney failure OR ESRD OR ESRF OR Kidney Chronic Failure OR Kidney Insufficien\* OR Kidney failure OR Terminal Kidney Failure):ti,ab,kw (Word variations have been searched)
2. MeSH descriptor: [Kidney Failure, Chronic] this term only
3. MeSH descriptor: [Renal Insufficiency, Chronic] this term only
4. (Kidney Allograft OR kidney transplantation OR Kidney transplant OR Renal transplant OR Kidney graft OR Renal graft OR Kidney donor OR Renal donor OR Kidney recipient OR Renal recipient):ti,ab,kw (Word variations have been searched)

5. MeSH descriptor: [Kidney Transplantation] this term only
6. (Hemofiltrat\* OR hemofiltration OR dialysis OR Kidney dialy\* OR Peritoneal dialysis OR predialy\* OR pre-dialy\* OR Renal replacement therapy OR Ultrafiltration OR ultrafiltrat\* OR Artificial kidney):ti,ab,kw (Word variations have been searched)
7. MeSH descriptor: [Renal Dialysis] explode all trees
8. MeSH descriptor: [Renal Replacement Therapy] this term only
9. (wait-listed OR wait listed OR waiting listed OR patient listed Or Waiting list OR Transplant list):ti,ab,kw (Word variations have been searched)
10. MeSH descriptor: [Waiting Lists] this term only
11. (death OR mortality OR survival analysis OR "survival analysis" OR survival rate):ti,ab,kw (Word variations have been searched)
12. MeSH descriptor: [Mortality] this term only
13. MeSH descriptor: [Survival Rate] this term only
14. MeSH descriptor: [Survival Analysis] explode all trees
15. #1 OR #2 OR #3
16. #4 OR #5
17. #6 OR #7 OR #8
18. #9 OR #10
19. #11 OR #12 OR #13 OR #14
20. #15 AND #16 AND #17 AND #18 AND #19

### **Web of Science (Core Collection)**

1. (TS=(Chronic kidney disease OR Chronic kidney failure OR Chronic Kidney Insufficien\* OR Chronic Nephropathy OR Chronic Renal Disease OR Chronic renal failure OR CRF OR Chronic Renal Insufficien\* OR End-stage renal disease OR End-stage renal failure OR End-stage kidney disease OR End-stage kidney failure OR ESRD OR ESRF OR Kidney Chronic Failure OR Kidney Insufficien\* OR Kidney failure OR Terminal Kidney Failure)) AND DOCUMENT TYPES: (Article)
2. (TS=(Kidney Allograft OR kidney transplantation OR Kidney transplant OR Renal transplant OR Kidney graft OR Renal graft OR Kidney donor OR Renal donor OR Kidney recipient OR Renal recipient)) AND DOCUMENT TYPES: (Article)
3. (TS=(Hemofiltrat\* OR hemofiltration OR dialysis OR Kidney dialy\* OR Renal dialysis OR Peritoneal dialysis OR predialy\* OR pre-dialy\* OR Renal replacement therapy OR Ultrafiltration OR ultrafiltrat\* OR Artificial kidney)) AND DOCUMENT TYPES: (Article)
4. (TS=(wait-listed OR wait listed OR waiting listed OR patient listed Or Waiting list OR Transplant list)) AND DOCUMENT TYPES: (Article)
5. (TS=(death OR mortality OR survival analysis OR "survival analysis" OR survival rate)) AND DOCUMENT TYPES: (Article)
6. (#5 AND #4 AND #3 AND #2 AND #1) AND DOCUMENT TYPES: (Article)





**Supplementary Table C. Baseline characteristics and overall outcomes of included studies.**

| Study Characteristics                 |                        |                         |                                  |                  |                   | Population type             |                            |                              |                       |               |                                         |                                         |                                         | Outcomes and quality                                              |           |
|---------------------------------------|------------------------|-------------------------|----------------------------------|------------------|-------------------|-----------------------------|----------------------------|------------------------------|-----------------------|---------------|-----------------------------------------|-----------------------------------------|-----------------------------------------|-------------------------------------------------------------------|-----------|
| Author and year                       | Country                | Study design            | Data source                      | Inclusion period | Follow-up (years) | Population type             | Waitlist group sample size | Transplant group sample size | Donor type            | Dialysis type | Mean Age $\pm$ SD in years (range) – WL | Mean Age $\pm$ SD in years (range) – Tx | Male (%)                                | For Long-Term Survival Transplantation better than dialysis (Y/N) | NOS score |
| <i>Cantaluppi et al. (1977)</i>       | Italy                  | Cohort study            | Single site                      | $\geq 1972$      | Max: 5            | –                           | 61                         | 66                           | DTx and LTx (grouped) | Home HD       | 37 $\pm$ 10 (19-52)                     | 34 $\pm$ 9 (17-54)                      | 66% (WL)<br>71% (Tx)                    | N                                                                 | 8         |
| <i>Golper et al. (1978)</i>           | US                     | Cohort Study            | Single site                      | 1971-1977        | Max: 6.8          | $\geq 45$ year              | 51                         | 30                           | DTx                   | NR            | 51 $\pm$ 4                              | 51 $\pm$ 3                              | NR                                      | N                                                                 | 7         |
| <i>Fauchald et al. (1988)</i>         | Norway                 | Cohort Study            | Multiple sites                   | 1981-1985        | Max: 6            | $\geq 60$ years             | 127                        | 122 (96 DTx, 26 LTx)         | DTx and LTx           | HD and CAPD   | 65.9                                    | 65.9                                    | NR                                      | Y                                                                 | 7         |
| <i>Port et al. (1993)</i>             | US                     | Cohort study (registry) | Michigan Kidney Registry         | 1984-1989        | Max: 6            | <65 years                   | 770                        | 799                          | DTx                   | NR            | NR                                      | NR                                      | 60% (Overall)                           | Y<br>N (KF-GN)                                                    | 9         |
| <i>Ojo et al. (1994)</i>              | US                     | Cohort study (registry) | Michigan Kidney Registry         | 1984-1989        | Max: 6            | <65 years                   | 534                        | 236                          | DTx                   | NR            | Median: 39.9                            | Median: 40.2                            | 60.6% (WL)<br>66.1% (Tx)                | Y                                                                 | 9         |
| <i>Bonal et al. (1997)</i>            | Spain                  | Cohort Study (registry) | RMRC                             | 1984-1993        | Max: 10           | 55-70 years                 | 395                        | 157                          | DTx                   | HD only       | 60.8                                    | 61.6                                    | 61.8% (WL)<br>57.8% (Tx)                | Y (50–59-years)<br>N (65–70 years)                                | 9         |
| <i>Segoloni et al. (1998)</i>         | Italy                  | Cohort study            | Single site                      | 1992-1996        | Max: 5            | –                           | 916                        | 344                          | NR                    | NR            | 46                                      | 45.4                                    | 64.3% (WL)<br>59.9% (Tx)                | Y (not statistically significant)                                 | 7         |
| <i>Wolfe et al. (1999)</i>            | US                     | Cohort study (registry) | USRDS                            | 1991-1996        | Max: 7            | <70 years                   | 22,889                     | 23,275                       | DTx                   | NR            | Median: 40-59 years                     | Median: 40-59 years                     | 60.5% (Overall)<br>63% (Tx)<br>58% (Dx) | Y                                                                 | 9         |
| <i>Medin et al. (2000)</i>            | Sweden                 | Cohort study            | Single site                      | 1987-1996        | Max: 10           | –                           | 170                        | 426 (DTx)<br>197 (LTx)       | DTx and LTx           | HD and PD     | 49 $\pm$ 13 (DTx and WL)                | 47 $\pm$ 13 (DTx)<br>40 $\pm$ 13        | NR<br>NR                                | Y (LTx > DTx)                                                     | 9         |
| <i>Rabbat et al. (2000)</i>           | Canada                 | Cohort study (registry) | CORR and MORE                    | 1990-1994        | Max: 6            | –                           | 1156                       | 722                          | DTx                   | NR            | 44.3                                    | 41.9                                    | 62.8% (WL)<br>63.4% (Tx)                | Y<br>N (KF-HTN)<br>N (KF-Hereditary)                              | 7         |
| <i>Kalo et al. (2001)</i>             | Hungary                | Cohort study (registry) | Hungarian subset of the ERA-EDTA | 1994             | Max: 3            | –                           | 430                        | 242                          | DTx                   | HD            | 41.9 $\pm$ 12.3                         | 49.0 $\pm$ 11.7                         | 60.9% (WL)<br>54.1% (Tx)                | Y                                                                 | 8         |
| <i>Straathof-Galema et al. (2001)</i> | Netherlands            | Cohort study            | Two sites                        | 1990-1997        | Max: 7            | –                           | 54                         | 102                          | DTx and LTx           | HD            | 48.1                                    | 49.8                                    | 61.8% (WL)<br>61.1% (Tx)                | N                                                                 | 9         |
| <i>McDonald et al. (2002)</i>         | Australia; New Zealand | Cohort study (registry) | ANZDATA                          | 1991-2001        | Max: 10           | >15 - <65 years             | 2782                       | 2362                         | DTx                   | HD and PD     | 46.2                                    | 43.8                                    | 58% (WL)<br>63% (Tx)                    | Y                                                                 | 9         |
| <i>Brunkhorst et al. (2003)</i>       | Germany                | Cohort Study (registry) | Regional registry                | 1978-1997        | Max: 19           | KF-DM1                      | 46                         | 46                           | DTx                   | HD only       | 43 $\pm$ 4.96                           | 45 $\pm$ 10.07                          | 67.4% (WL)<br>67.4% (Tx)                | Y                                                                 | 9         |
| <i>Glanton et al. (2003)</i>          | US                     | Cohort study (registry) | USRDS                            | 1995-1999        | Max: 7            | Obese (BMI $\geq 30$ km/m2) | 5172                       | 1719 DTx<br>552 LTx          | DTx and LTx           | HD and PD     | NR                                      | NR                                      | 54.4% (Overall)                         | Y (BMI = 30 kg/m2; LTx > DTx)<br>N (BMI $\geq 41$ kg/m2)          |           |

| Study Characteristics |               |                         |                                                                           |                  |                     | Population type             |                            |                              |                       |               |                                         |                                         |                                             | Outcomes and quality                                              |           |
|-----------------------|---------------|-------------------------|---------------------------------------------------------------------------|------------------|---------------------|-----------------------------|----------------------------|------------------------------|-----------------------|---------------|-----------------------------------------|-----------------------------------------|---------------------------------------------|-------------------------------------------------------------------|-----------|
| Author and year       | Country       | Study design            | Data source                                                               | Inclusion period | Follow-up (years)   | Population type             | Waitlist group sample size | Transplant group sample size | Donor type            | Dialysis type | Mean Age $\pm$ SD in years (range) – WL | Mean Age $\pm$ SD in years (range) – Tx | Male (%)                                    | For Long-Term Survival Transplantation better than dialysis (Y/N) | NOS score |
|                       |               |                         |                                                                           |                  |                     | nObese                      | 16,896                     | 4795 DTx<br>1528 LTx         |                       |               |                                         |                                         | NR                                          | Y                                                                 |           |
| Abbott et al. (2004)  | US            | Cohort study (registry) | USRDS and UNOS                                                            | 1995-2000        | Max: 6              | HCV+ Donor                  | 17,094                     | 389                          | DTx (HCV+ Donor)      | HD and PD     | 50.1 $\pm$ 12.7                         | 51.2 $\pm$ 11.3                         | 59.9% (WL)<br>75.3% (Tx HCV+ Donor)         | Y (HCV- > HCV+)                                                   | 9         |
|                       |               |                         |                                                                           |                  |                     | HCV- Donor                  | ""                         | 16,595                       |                       |               |                                         |                                         | 62.9% (Tx HCV- Donor)                       | Y                                                                 |           |
| Gibney et al. (2004)  | US            | Cohort study (registry) | UNOS                                                                      | 1985-2002        | Max: 6.8            | Systemic sclerosis patients | 116                        | 115                          | DTx and LTx           | HD            | –                                       | 52 $\pm$ 10                             | 22% (Overall)                               | Y                                                                 | 9         |
| Oniscu et al. (2004)  | UK (Scotland) | Cohort study (registry) | Scottish renal registry and UK transplant databases                       | 1989-1999        | Max: 11             | $\geq$ 60 years             | 197                        | 128                          | NR                    | HD and PD     | Median: 66.3 (IQR: 63.0-72.9)           | Median: 64.0 (IQR: 58.5-69.5)           | 59.4 (WL)<br>84.8 (Tx)                      | Y                                                                 | 7         |
| Gill et al. (2005)    | US            | Cohort Study (registry) | USRDS                                                                     | 1995-2000        | Max: 6              | < 75 years                  | 35,549                     | 19,666                       | DTx                   | NR            | 49 $\pm$ 13                             | 46 $\pm$ 14                             | 58% (WL)<br>62% (Tx)                        | Y                                                                 | 9         |
| Merion et al. (2005)  | US            | Cohort study (registry) | SRTR                                                                      | 1995-2002        | Max: 10             | ECD                         | 45,082                     | 7790                         | SCD, ECD and LTx      | NR            | 40-59                                   | 40-59                                   | 58.1% (WL)<br>62.2 (ECD)                    | Y                                                                 | 9         |
|                       |               |                         |                                                                           |                  |                     | SCD                         | ""                         | 41,052                       |                       |               |                                         | Median: 40-59                           | 60.6 (SCD)                                  | Y (SCD > ECD)                                                     |           |
| Oniscu et al. (2005)  | UK (Scotland) | Cohort study (registry) | Scottish renal registry and UK transplant databases and case-note reviews | 1989-1999        | Max: 11             | –                           | 641                        | 1095                         | DTx                   | HD and PD     | 52.77 $\pm$ 12.92                       | 42.98 $\pm$ 13.56                       | 61.8 (WL)<br>61.2 (Tx)                      | Y                                                                 | 9         |
| Snyder et al. (2006)  | US            | Cohort Study (registry) | USRDS                                                                     | 1995-2003        | –                   | $\geq$ 18 years DM          | 19,107                     | 11,418 (3% pre-emptive)      | DTx                   | NR            | Median: 50-64                           | Median: 50-64                           | 59% (WL)<br>60% (Tx)                        | Y – Patients with PAD<br>Y – Patients without PAD                 | 9         |
|                       |               |                         |                                                                           |                  |                     | $\geq$ 18 years nDM         | 34,202                     | 32,009 (3% pre-emptive)      |                       |               | Median: 35-49                           | Median: 35-49                           | 60% (Tx)                                    | Y – Patients with PAD<br>Y – Patients without PAD                 |           |
| Gill et al. (2007)    | US            | Cohort study (registry) | USRDS                                                                     | 1995-2003        | NR                  | >18 years                   | 41,769                     | 47,433                       | DTx and LTx (grouped) | HD and PD     | –                                       | 49.6 $\pm$ 13.2                         | 60.1% (Overall)<br>61.7% (Tx)<br>58.3% (Dx) | Y                                                                 | 9         |
| Rao et al. (2007)     | US            | Cohort study (registry) | SRTR                                                                      | 1990-2004        | Max: 15             | $\geq$ 70 years             | 3229                       | 1390 DTx 688 ECD             | DTx and ECD           | NR            | Median: 70-74                           | Median: 70-74                           | 66.5% (WL)<br>70.1% (Tx)                    | Y (LTx > ECD)<br>N (KF-GN)                                        | 9         |
| Savoye et al. (2007)  | France        | Cohort study (registry) | National registry (REIN from 2002 onwards)                                | 1996-2004        | Mean: 2.9 $\pm$ 2.4 | $\geq$ 60 years             | 746                        | 1962                         | SCD and ECD           | NR            | NR                                      | NR                                      | 64% (Overall)                               | Y (SCD > ECD)                                                     | 9         |
| Sorensen et al.       | Denmark       | Cohort study            | DNR and the                                                               | 1994-2005        | Max: 12             | DM                          | 211                        | 114                          | DTx and               | HD and        | 48.5 $\pm$ 12                           | 40.8 $\pm$ 14                           | NR                                          | Y                                                                 | 7         |



| Study Characteristics    |               |                         |                                                          |                  |                                                      | Population type               |                             |                              |                   |                   |                                         |                                         |                          | Outcomes and quality                                                                                  |           |
|--------------------------|---------------|-------------------------|----------------------------------------------------------|------------------|------------------------------------------------------|-------------------------------|-----------------------------|------------------------------|-------------------|-------------------|-----------------------------------------|-----------------------------------------|--------------------------|-------------------------------------------------------------------------------------------------------|-----------|
| Author and year          | Country       | Study design            | Data source                                              | Inclusion period | Follow-up (years)                                    | Population type               | Waitlist group sample size  | Transplant group sample size | Donor type        | Dialysis type     | Mean Age $\pm$ SD in years (range) – WL | Mean Age $\pm$ SD in years (range) – Tx | Male (%)                 | For Long-Term Survival Transplantation better than dialysis (Y/N)                                     | NOS score |
| (2007)                   |               | (registry)              | ScandiTransplant                                         |                  | years                                                |                               |                             |                              | LTx (grouped)     | PD                |                                         |                                         |                          |                                                                                                       |           |
| Patel et al. (2008)      | UK (Scotland) | Cohort Study            | Single site                                              | 2002-2005        | Median: 2.64                                         | –                             | 1028                        | 403                          | DTx               | HD and PD         | –                                       | –                                       | NR                       | Y                                                                                                     | 7         |
| Pauly et al. (2009)      | US and Canada | Cohort Study (registry) | 2 dialysis sites in Canada and matched cohort from USRDS | 1994-2006        | Median: 3.77 – NHD                                   | –                             | 177                         | 531 SCD                      | SCD               | Home nocturnal HD | 46.4 $\pm$ 11.8                         | 46.9 $\pm$ 12.2                         | 65% (WL)<br>57.8% (DTx)  | N                                                                                                     | 9         |
|                          |               |                         |                                                          |                  | Median: 4.62 – DTx                                   |                               |                             |                              |                   |                   |                                         |                                         | 531 LTx                  |                                                                                                       |           |
| Heldal et al. (2010)     | Norway        | Cohort study (registry) | Norwegian Renal Registry                                 | 1990-2005        | Max: 19                                              | $\geq$ 70 years               | 53                          | 233 (36 pre-emptively)       | DTx and LTx       | HD and PD         | Median: 73.4 (IQR: 69.5-82.0)           | Median: 74.5 (IQR: 71.0-82.1)           | 81% (WL)<br>68% (Tx)     | N – Start time of dialysis era: 1990-1994<br>Y – Start time of dialysis era: 2000-2005                | 9         |
| Kumar et al. (2011)      | UK (England)  | Cohort study            | Single site                                              | 2006-2009        | Mean: 2.5 $\pm$ 1                                    | Significant coronary disease* | 88 (all patients had a PCI) | 51 (all patients had a CABG) | DTx               | NR                | NR                                      | NR                                      | NR                       | Y                                                                                                     | 7         |
| Bisigniano et al. (2012) | Argentina     | Cohort study (registry) | SINTRA software (INCUCAI - National registry)            | 2005-2009        | Max: 5                                               | $>$ 18 years                  | 3647                        | 1682                         | DTx               | NR                | 47.88                                   | 48.14                                   | NR                       | Y                                                                                                     | 9         |
| De Lima et al. (2012)    | Brazil        | Cohort study            | Single site                                              | NR               | Mean: 1.9 $\pm$ 1.3 (WL)<br>Mean: 2.1 $\pm$ 1.5 (Tx) | $>$ 18 years                  | 888                         | 270                          | DTx               | HD                | 54.8 $\pm$ 11.0                         | 50.1 $\pm$ 10.0                         | 62% (WL)<br>57% (Tx)     | Y (high-risk patients)<br>N (low-risk patients)<br>Defined by the American Society of Transplantation | 7         |
| Bouaoun et al. (2013)    | France        | Cohort study (registry) | REIN                                                     | 2002-2009        | Max: 4<br>Max: 8 years                               | –                             | 1706                        | 2146                         | DTx and LTx       | NR                | 50.2 $\pm$ 13                           | 47.85 $\pm$ 14.1                        | 61.5% (WL)<br>63.9% (Tx) | Y                                                                                                     | 9         |
| Gill et al. (2013)       | US            | Cohort study (registry) | USRDS                                                    | 1995-2007        | Median: 2.67                                         | $\geq$ 65 years               | 14,396                      | 11,072                       | SCD, LTx, and ECD | NR                | NR                                      | NR                                      | 63% (Overall)            | Y (LTx $>$ SCD $>$ ECD)                                                                               | 8         |
|                          |               |                         |                                                          |                  |                                                      | High risk**                   |                             |                              |                   |                   |                                         |                                         |                          |                                                                                                       |           |

| Study Characteristics    |         |                         |                               |                  |                                    | Population type                                   |                            |                               |                                                     |               |                                         |                                         | Outcomes and quality                        |                                                                                         |           |
|--------------------------|---------|-------------------------|-------------------------------|------------------|------------------------------------|---------------------------------------------------|----------------------------|-------------------------------|-----------------------------------------------------|---------------|-----------------------------------------|-----------------------------------------|---------------------------------------------|-----------------------------------------------------------------------------------------|-----------|
| Author and year          | Country | Study design            | Data source                   | Inclusion period | Follow-up (years)                  | Population type                                   | Waitlist group sample size | Transplant group sample size  | Donor type                                          | Dialysis type | Mean Age $\pm$ SD in years (range) – WL | Mean Age $\pm$ SD in years (range) – Tx | Male (%)                                    | For Long-Term Survival Transplantation better than dialysis (Y/N)                       | NOS score |
|                          |         |                         |                               |                  |                                    | Intermediate risk**                               | ""                         | 1397                          | 46% SCD; 30% ECD; 24% LD                            |               |                                         |                                         | 69% (Overall)                               | Y                                                                                       |           |
|                          |         |                         |                               |                  |                                    | Low risk**                                        | ""                         | 5825                          | 45% SCD; 29% ECD; 25% LD                            |               |                                         |                                         | 60% (Overall)                               | Y                                                                                       |           |
| Schold et al. (2014)     | US      | Cohort study (registry) | SRTR                          | 2003-2010        | Median: 3.6<br>Max: 5              | $\geq 18$ years                                   | 131,845                    | 59,199                        | DTx                                                 | NR            | NR                                      | NR                                      | 60% (Overall)                               | Y – centres with higher-than-expected outcomes<br>Y – centres with as-expected outcomes | 9         |
| Lloveras et al. (2015)   | Spain   | Cohort study (registry) | RMRC                          | 1990-2010        | Median: 3.2 years<br>Max: 21 years | –                                                 | 823                        | 823                           | ECD ( $\geq 65$ years of age)                       | HD            | 61.7 $\pm$ 8.2                          | 61.6 $\pm$ 7.8                          | 64% (Overall)<br>64% (WL)<br>64% (Tx)       | Y                                                                                       | 9         |
| Brar et al. (2016)       | US      | Cohort study (registry) | USRDS                         | 2001-2007        | Max: 8                             | Incident dialysis patients with PAD and <70 years | 1843                       | 2121 (grouped)                | DTx and LTx                                         | NR            | Median: 40-59                           | Median: 40-59                           | 68.6% (WL)<br>71.3% (Tx)                    |                                                                                         | 9         |
|                          |         |                         |                               |                  |                                    |                                                   | ""                         | 1328 DTx                      |                                                     |               | Median: 40-59                           | Median: 40-59                           | 70.9% (DTx)                                 | N                                                                                       |           |
|                          |         |                         |                               |                  |                                    |                                                   | ""                         | 793 LTx                       |                                                     |               | Median: 40-59                           | Median: 40-59                           | 72% (LTx)                                   | Y                                                                                       |           |
| Cassuto et al. (2016)    | US      | Cohort study (registry) | UNOS                          | 1994-2008        | Max: 15 years                      | $\geq 18$ years of age with PAD                   | 13647                      | 4430 (671 pre-emptive)        | SCD, LTx, and ECD (61.9% SCD; 21.7% LTx; 16.4% ECD) | NR            | NR                                      | 55.1 $\pm$ 10.7                         | 54.3% (Tx)<br>NR (WL)                       | Y (LTx > SCD > ECD)                                                                     | 9         |
| Perez-Saez et al. (2016) | Spain   | Cohort study (registry) | RMRC                          | 1990-2013        | Max: 25 (WL)<br>Max: 23 (Tx)       | –                                                 | 1651                       | 389                           | DTx ( $\geq 75$ years of age)                       | NR            | –                                       | 66.9 $\pm$ 6.2                          | 65.6% (Overall)<br>67.2% (WL)<br>58.8% (Tx) | Y (Overall)<br>N (KF-DM)<br>N (COPD)<br>N (aged $\geq 70$ years)                        | 9         |
| Sorensen et al. (2016)   | Denmark | Cohort study (registry) | DNR and the Scandiatransplant | 1995-2011        | Max: 22 years                      | –                                                 | 825                        | 2349 (of which 1535 were LTx) | DTx and LTx                                         | NR            | Median: 55-64                           | Median: 18-44                           | 62% (WL)<br>62% (Tx)                        | Y (LTx > DTx)                                                                           | 9         |
| Kaballo et al. (2018)    | Ireland | Cohort study (registry) | National registry             | 2004-2013        | Mean: 2.5                          | $\leq 70$ years                                   | 1157                       | 990                           | DTx                                                 | NR            | Median: 40-59                           | Median: 40-59                           | 65% (WL)<br>63% (Tx)                        | Y                                                                                       | 9         |
| Legeai et al. (2018)     | France  | Cohort study (registry) | REIN                          | 2002-2013        | Mean: 2.0 $\pm$ 2.2                | $\geq 70$ years                                   | 342                        | 877 (160 pre-emptive)         | SCD, LTx, and ECD (39 SCD;                          | NR            | 73.4 $\pm$ 2.9                          | 73.0 $\pm$ 2.4                          | 71.1% (WL)<br>67.8% (Tx)                    | N (risk with Tx had halved by 9 months compared to first 3                              | 9         |

| Study Characteristics  |           |                         |                                                |                  |                         | Population type          |                            |                              |                     |               |                                         |                                         | Outcomes and quality     |                                                                   |           |
|------------------------|-----------|-------------------------|------------------------------------------------|------------------|-------------------------|--------------------------|----------------------------|------------------------------|---------------------|---------------|-----------------------------------------|-----------------------------------------|--------------------------|-------------------------------------------------------------------|-----------|
| Author and year        | Country   | Study design            | Data source                                    | Inclusion period | Follow-up (years)       | Population type          | Waitlist group sample size | Transplant group sample size | Donor type          | Dialysis type | Mean Age $\pm$ SD in years (range) – WL | Mean Age $\pm$ SD in years (range) – Tx | Male (%)                 | For Long-Term Survival Transplantation better than dialysis (Y/N) | NOS score |
|                        |           |                         |                                                |                  |                         |                          |                            |                              | 28 LTx;<br>810 ECD) |               |                                         |                                         |                          | months, the perioperative risk was still not offset by month 36)  |           |
| Clark et al. (2019)    | US        | Cohort study (registry) | USRDS                                          | 1995-2014        | Mean: 6.5 $\pm$ 4.6     | 18-75 years              | 322,267                    | 127,670                      | DTx                 | NR            | NR                                      | NR                                      | NR                       | Y                                                                 | 7         |
| Sawinski et al. (2019) | US        | Cohort study (registry) | Davita linkage with OPTN                       | 2004-2014        | Median: 1.8             | $\geq$ 18 years and HCV+ | 34,018                     | 1117                         | DTx (HCV- and HCV+) | HD and PD     | NR                                      | NR                                      | NR                       | Y (HCV- > HCV+)                                                   | 7         |
|                        | Spain     | Cohort study (registry) | RMRC                                           | 1990-2014        | Median: 4<br>Max: 21    | $\geq$ 60 years          | 1373                       | 1212 (Overall)               | NR                  | HD and PD     | –                                       | Mean: 70.1                              | 64.8% (WL)<br>67.9% (Tx) | Y                                                                 |           |
| Arcos et al. (2020)    |           |                         |                                                |                  |                         |                          | ""                         | 1084 (donors 60-79y)         |                     |               |                                         |                                         | 61% (Tx)                 | Y – Global<br>Y – <70y<br>Y – $\geq$ 70y                          | 9         |
|                        |           |                         |                                                |                  |                         |                          | ""                         | 128 (donors $\geq$ 80y)      |                     |               |                                         |                                         | 58.6% (Tx)               | Y – Global<br>Y – <70y<br>N – $\geq$ 70y                          |           |
| Fragale et al., 2020   | Argentina | Cohort study            | Multiple sites (n = 8) with linkage to SINTA   | 2006-2016        | Median: 2.5<br>Max: 4.1 | $\geq$ 60 years          | 351                        | 351                          | DTx                 | NR            | 66.66 $\pm$ 4.91                        | 66.31 $\pm$ 4.59                        | 61% (WL)<br>59% (Tx)     | Y                                                                 | 9         |
| Lenain et al., 2021    | France    | Cohort study (registry) | REIN                                           | 2005-2016        | Median: 3.5             | Adult patients           | 10646                      | 10,646                       | DTx                 | NR            | Median: 56.9 (IQR: 45.8-65.1)           | Median: 55.3 (IQR: 44.5-64.0)           | 64% (WL)<br>64% (Tx)     | Y                                                                 | 9         |
| Hellemans et al., 2021 | Belgium   | Cohort study (registry) | ERA-EDTA linkage with Belgium renal registries | 2000-2012        | Max: 16                 | $\geq$ 18 years          | 426                        | 3382                         | SCD and ECD         | HD and PD     | Median: 56 (IQR: 47-63)                 | Median: 53 (IQR: 44-61)                 | 60% (WL)<br>63% (Tx)     | Y (SCD > ECD)                                                     | 9         |

**Abbreviations:** ANZDATA = Australia And New Zealand Dialysis And Transplant Registry; BMI = Body Mass Index; CABG = Coronary Artery Bypass Graft; COPD = Chronic Obstructive Pulmonary Disease; CORR = Canadian Organ Replacement Register; DM = Diabetes Mellitus; DNR = The Danish National Register On Regular Dialysis And Transplantation; DTx = Deceased Donor Transplantation; Davita = National Dialysis Provider In 47 States; ECD = Extended Criteria Donor; ERA-EDTA = European Renal Association-European Dialysis And Transplant Association; HCV+ = Hepatitis C Virus Positive; HCV+ Donor = Hepatitis C Virus Donor; HCV– Donor = Hepatitis C Virus Negative Donor; HD = Haemodialysis; INCUCAI = Instituto Nacional Central Unico Coordinador De Ablacion E Implante; KF-DM = Kidney Failure caused by Diabetes Mellitus; KF-DM1 = Kidney Failure caused by Diabetes Mellitus Type 1; KF-GN = Kidney Failure caused by Glomerulonephritis; KF-HTN = Kidney Failure caused by Hypertension; KF-Hereditary = Kidney Failure caused by Hereditary Cause; LTx = Living Donor Transplantation; MORE = Multiple Organ Retrieval and Exchange Program (Regional Registry); nDM = No Diabetes Mellitus; nObese = Not Obese; NOS = Newcastle-Ottawa Scale; NR = Not Reported; PAD = Peripheral Arterial Disease; PCI = Percutaneous Coronary Intervention; PD = Peritoneal Dialysis; REIN = Renal Epidemiology And Information Network Registry; RMRC = Catalan Renal Registry; SCD = Standard Criteria Donor; SINTRA = Sistema Nacional De Información De Procuración Y Trasplante De La República Argentina; SRTR = Scientific Registry Of Transplant Recipients; Tx = Transplantation; UK = United Kingdom; UNOS = United Network For Organ Sharing; US = United States; USRDS = United States Renal Data System; WL = Waitlisted Dialysis Group

**Note:**

*The studies are sorted by year and the first author's last name.*

*Text highlighted in red indicates group or subgroups of patients in which long-term mortality risk, between those who underwent transplantation and those who remained waitlisted on dialysis, was not statistically different.*

*\*Defined as >75% stenosis of one or more coronary vessels, >50% left main stem disease, or an equivocal lesion with flow limitation*

*\*\*High risk group = all patients with diabetes as either cause of kidney failure or as comorbid condition were considered high risk*

*\*\*Intermediate risk = if they had one or two of the following comorbid conditions: ischemic heart disease, congestive heart failure, cerebrovascular accident, peripheral vascular disease*

*\*\*Low risk = if patients had 0 cardiovascular comorbid conditions*

**Supplementary Table D.** Statistical analysis procedures adopted in studies and detailed outcomes

| Author and year                 | Country | Statistical analysis type                                                                                                                                                                                                                                                                                          | Intention to treat approach | Start of analysis | End of analysis                                          | Adjusted model (Y/N) | Covariates in fully adjusted model                                                                                                                 | Detailed Outcomes                                                                                                                                                                                                                                                                                                                                                                                                                                                                |
|---------------------------------|---------|--------------------------------------------------------------------------------------------------------------------------------------------------------------------------------------------------------------------------------------------------------------------------------------------------------------------|-----------------------------|-------------------|----------------------------------------------------------|----------------------|----------------------------------------------------------------------------------------------------------------------------------------------------|----------------------------------------------------------------------------------------------------------------------------------------------------------------------------------------------------------------------------------------------------------------------------------------------------------------------------------------------------------------------------------------------------------------------------------------------------------------------------------|
| <i>Cantaluppi et al. (1977)</i> | Italy   | Survival was assessed using actuarial survival curves                                                                                                                                                                                                                                                              | NA                          | NR                | NR                                                       | N                    | NA                                                                                                                                                 | No statistical difference between Tx and dialysis at any time interval                                                                                                                                                                                                                                                                                                                                                                                                           |
| <i>Golper et al. (1978)</i>     | USA     | Survival analysis of the 2 patient groups was calculated by the life-table method. Patients were removed from the waitlist group upon transplantation and patients in the transplantation group were removed as alive if they had been on maintenance dialysis for 3 months following failure of their transplant. | NA                          | NR                | NR                                                       | N                    | NA                                                                                                                                                 | No statistical difference between Tx and dialysis at any time interval                                                                                                                                                                                                                                                                                                                                                                                                           |
| <i>Fauchald et al. (1988)</i>   | Norway  | Kaplan–Meier Estimator                                                                                                                                                                                                                                                                                             | NA                          | NR                | NR                                                       | N                    | NA                                                                                                                                                 | >1 year survival was greater for Tx                                                                                                                                                                                                                                                                                                                                                                                                                                              |
| <i>Port et al. (1993)</i>       | USA     | Time-dependent Cox regression model                                                                                                                                                                                                                                                                                | Y                           | Listing on WL     | Death, unavailable for follow-up or end of study period. | Y                    | Age, Sex, Race, Primary cause of ESRD, and time since waitlisting to transplantation                                                               | 0–30-day survival was greater for Dx<br>RR: 2.43 (P < 0.01) – Overall<br>RR: 1.94 (P > 0.05) – Diabetes<br>RR: 1.58 (P > 0.05) – Glomerulonephritis<br>RR: 2.73 (P > 0.05) – Hypertension<br><br>>1 year survival was greater for Tx<br>RR: 0.36 (P < 0.001) – Overall<br>RR: 0.25 (P < 0.01) – Diabetes<br>RR: 1.16 (P > 0.05) – Glomerulonephritis<br>RR: 0.51 (P > 0.05) – Hypertension<br><br>Equal mortality risk = 117±28 days<br>Equal cumulative mortality = 325±91 days |
| <i>Ojo et al. (1994)</i>        | USA     | Time-dependent Cox regression model                                                                                                                                                                                                                                                                                | Y                           | Listing on WL     | Death, unavailable for follow-up or end of study period. | Y                    | Age, Sex, Race, Primary cause of ESRD, and time since waitlisting to transplantation                                                               | 0–30-day survival was greater for Dx<br>RR: 3.3 (P < 0.03)<br><br>>1 year survival was greater for Tx<br>RR: 0.49 (P < 0.03)<br><br>Equal mortality risk = 112 days<br>Equal cumulative mortality = 378 days                                                                                                                                                                                                                                                                     |
| <i>Bonal et al. (1997)</i>      | Spain   | Cox proportional hazard model with Epilog program. Relative risk estimates were determined with maximal likelihood method and chi-square test.                                                                                                                                                                     | Y                           | NR                | NR                                                       | Y                    | Age group, functional autonomy degree, and presence or absence of cardiovascular comorbidities (IHD, cardiomyopathy, cardiac arrhythmia or stroke) | In patients 50–59-years Tx offered survival advantage.<br>HR: 0.51 (P = 0.02) – Overall<br>HR: 55-59 (ref) = 1<br>HR: 60-64 = 1.07 (P = 0.75)<br>HR: 65-70 = 1.87 (P = 0.01)<br><br>In patients 65-70 years no survival difference was observed between WL dialysis group and Tx                                                                                                                                                                                                 |
| <i>Segolani et al. (1998)</i>   | Italy   | Kaplan–Meier Estimator with Breslow and log-rank tests                                                                                                                                                                                                                                                             | NR                          | Transplant        | NR                                                       | N                    | NA                                                                                                                                                 | Survival advantage greater with Tx compared to dialysis for the overall cohort and for >50 years ( not statistically significant)                                                                                                                                                                                                                                                                                                                                                |
| <i>Wolfe et al. (1999)</i>      | USA     | Time-dependent Cox regression model                                                                                                                                                                                                                                                                                | Y                           | Listing on WL     | Death, unavailable for follow-up or end of study         | Y                    | Age, sex, race, cause of ESRD, year of placement on the waiting list, geographic region, and time from the                                         | >18-month survival was greater for Tx<br>RR: 0.32 (0.30 to 0.35; P < 0.001) – Overall<br>RR: 0.24 (0.20 to 0.29; P < 0.001) – 20-39 year<br>RR: 0.33 (0.29 to 0.37; P < 0.001) – 40-59 year                                                                                                                                                                                                                                                                                      |

| Author and year                       | Country                | Statistical analysis type                                                                                                                                                                                                                                                                                                 | Intention to treat approach | Start of analysis                                                    | End of analysis                                          | Adjusted model (Y/N) | Covariates in fully adjusted model                                                                | Detailed Outcomes                                                                                                                                                                                                                                                                                                                                                                                                                                                                                                                                                                                                                                                                                                                                                            |
|---------------------------------------|------------------------|---------------------------------------------------------------------------------------------------------------------------------------------------------------------------------------------------------------------------------------------------------------------------------------------------------------------------|-----------------------------|----------------------------------------------------------------------|----------------------------------------------------------|----------------------|---------------------------------------------------------------------------------------------------|------------------------------------------------------------------------------------------------------------------------------------------------------------------------------------------------------------------------------------------------------------------------------------------------------------------------------------------------------------------------------------------------------------------------------------------------------------------------------------------------------------------------------------------------------------------------------------------------------------------------------------------------------------------------------------------------------------------------------------------------------------------------------|
|                                       |                        |                                                                                                                                                                                                                                                                                                                           |                             |                                                                      | period.                                                  |                      | first treatment for ESRD to placement on the waiting list                                         | RR: 0.39 (0.33 to 0.47; P < 0.001) – 60-74 year<br>RR: 0.27 (0.24 to 0.30; P < 0.001) – ESRD-DM<br>RR: 0.39 (0.31 to 0.48; P < 0.001) – ESRD-GN<br><br>Overall Equal mortality risk = 106 days<br>Equal cumulative mortality = 325±91 days                                                                                                                                                                                                                                                                                                                                                                                                                                                                                                                                   |
| <b>Medin et al. (2000)</b>            | Sweden                 | Kaplan–Meier Estimator and Cox proportional hazard model                                                                                                                                                                                                                                                                  | Y                           | Listing on WL                                                        | Death, unavailable for follow-up or end of study period. | Y                    | Age                                                                                               | Long term survival advantage was greater with Tx (DTx or LTx) compared to dialysis. Most pronounced difference was between LTx and DTx rather than between DTx and dialysis.<br><br>RR of death:<br>DTx = 1 (ref)<br>LTx = 0.46 (0.27 to 0.78)<br>WL = 1.49 (1.12 to 1.99)                                                                                                                                                                                                                                                                                                                                                                                                                                                                                                   |
| <b>Rabbat et al. (2000)</b>           | Canada                 | Time-dependent Cox regression model                                                                                                                                                                                                                                                                                       | Y                           | Listing on WL                                                        | Death, unavailable for follow-up or end of study period. | Y                    | Age, race, gender, and time from start of ESRD therapy to wait-listing                            | Long term survival advantage was greater with Tx compared to dialysis. Survival advantage was most pronounced in patients with diabetes and glomerulonephritis as causes of ESRD.<br><br>0–30-day survival was greater for Dx<br>RR: 2.91 (1.34 to 6.32) – Overall<br>RR: 1.87 (0.44 to 7.89) – Diabetes<br>RR: 1.55 (0.91 to 11.71) – Glomerulonephritis<br>RR: 8.46 (0.87 to 82.54) – Hypertension<br>RR: 8.82 (0.91 to 85.67) – Hereditary<br>RR: 5.89 (1.26 to 27.58) – Other<br><br>>1 year survival was greater for Tx<br>RR: 0.25 (0.14 to 0.42) – Overall<br>RR: 0.38 (0.17 to 0.87) – Diabetes<br>RR: 0.13 (0.04 to 0.39) – Glomerulonephritis<br>RR: 0.56 (0.11 to 2.77) – Hypertension<br>RR: 0.45 (0.06 to 3.26) – Hereditary<br>RR: 0.22 (0.05 to 0.93) – Other |
| <b>Kalo et al. (2001)</b>             | Hungary                | Mortality data was analysed using the standardized mortality hazard function, the standardized survival function, the relative and absolute risk reduction of mortality, and the number of patients needed to treat by transplantation to avoid 1 death. Cox regression was then used to calculate mortality differences. | NR                          | NA                                                                   | NA                                                       | Y                    | Age, sex, and length of ESRD before commencement of the study period                              | 3-year survival was greater for Tx<br>RR: 0.723 (P = 0.06)                                                                                                                                                                                                                                                                                                                                                                                                                                                                                                                                                                                                                                                                                                                   |
| <b>Straathof-Galema et al. (2001)</b> | Netherlands            | Kaplan–Meier Estimator                                                                                                                                                                                                                                                                                                    | NR                          | Listing on WL or date of first dialysis therapy, whichever came last | Death, unavailable for follow-up or end of study period. | N                    | NA                                                                                                | No statistical difference between Tx and dialysis at any time interval                                                                                                                                                                                                                                                                                                                                                                                                                                                                                                                                                                                                                                                                                                       |
| <b>McDonald et al. (2002)</b>         | Australia; New Zealand | Time-dependent Cox regression model                                                                                                                                                                                                                                                                                       | Y                           | Listing on WL                                                        | Death, unavailable for follow-up or end of study         | Y                    | Age, gender, race, and co-morbidities (diabetes, smoking, coronary artery disease, and peripheral | 0–3-month survival was greater for Dx<br>HR: 2.0 (1.5 to 2.7; P < 0.001)<br><br>≥1-year survival was greater for Tx                                                                                                                                                                                                                                                                                                                                                                                                                                                                                                                                                                                                                                                          |

| Author and year                 | Country       | Statistical analysis type                      | Intention to treat approach | Start of analysis | End of analysis                                           | Adjusted model (Y/N) | Covariates in fully adjusted model                                                                                                                                                                                                                                                              | Detailed Outcomes                                                                                                                                                                                                                                                                                                                                                                                                                                                                                                                                                                                                                                                                                                                                                                                                                    |
|---------------------------------|---------------|------------------------------------------------|-----------------------------|-------------------|-----------------------------------------------------------|----------------------|-------------------------------------------------------------------------------------------------------------------------------------------------------------------------------------------------------------------------------------------------------------------------------------------------|--------------------------------------------------------------------------------------------------------------------------------------------------------------------------------------------------------------------------------------------------------------------------------------------------------------------------------------------------------------------------------------------------------------------------------------------------------------------------------------------------------------------------------------------------------------------------------------------------------------------------------------------------------------------------------------------------------------------------------------------------------------------------------------------------------------------------------------|
|                                 |               |                                                |                             |                   | period.                                                   |                      | vascular disease)                                                                                                                                                                                                                                                                               | HR: 0.19 (0.15 to 0.24; P < 0.001)                                                                                                                                                                                                                                                                                                                                                                                                                                                                                                                                                                                                                                                                                                                                                                                                   |
| <b>Brunkhorst et al. (2003)</b> | Germany       | Kaplan–Meier Estimator and Cox model           | NR                          | Listing on WL     | Death, graft loss or both                                 | Y                    | Unclear but believed to be: Dialysis, serum cholesterol, mean, arterial blood pressure, number of antihypertensive drugs, serum calcium, serum phosphorus, and HbA1c                                                                                                                            | Long term survival advantage was greater with Tx compared to dialysis in patients with ESRD caused by T1DM.<br><br>RR: 0.46 (0.26 to 0.82; P = 0.009) - 10 year mortality risk                                                                                                                                                                                                                                                                                                                                                                                                                                                                                                                                                                                                                                                       |
| <b>Glanton et al. (2003)</b>    | USA           | Time-dependent (discrete) Cox regression model | Y                           | Listing on WL     | Death, latest available follow-up or end of study period. | Y                    | Age, race, cause of ESRD, year of first dialysis, presence of congestive heart failure, and serum albumin levels                                                                                                                                                                                | Long term survival advantage was greater with Tx (DTx or LTx) compared to dialysis. Magnitude of benefit of Tx over dialysis was similar for both obese and non-obese ESRD patients. Benefit of DTx did not apply to patients with BMI ≥41 kg/m <sup>2</sup> .<br><br>HR: 0.39 (0.33 to 0.47; P < 0.001) – DTx<br>HR: 0.23 (0.16 to 0.34; P < 0.001) – LTx<br>HR: <b>0.47 (0.17 to 1.25; P = 0.13) – BMI ≥ 41 kg/m<sup>2</sup></b><br>HR: 1.81 (1.55 to 2.11; P < 0.001) – ESRD-DM vs all other causes (CTx)<br>HR: 1.86 (1.60 to 2.18; P < 0.001) – ESRD-DM vs all other causes (LTx)<br>HR: 1.74 (1.42 to 2.12; P < 0.001) – PVD vs. absent (CTx)<br>HR: 1.70 (1.39 to 1.64; P < 0.001) – PVD vs. absent (LTx)<br>HR: 1.42 (1.22 to 1.65; P < 0.001) – CHF vs. absent (CTx)<br>HR: 1.40 (1.19 to 1.66; P < 0.001) – CHF vs. absent |
| <b>Abbott et al. (2004)</b>     | USA           | Time-dependent (discrete) Cox regression model | Y                           | Listing on WL     | Death, unavailable for follow-up or end of study period.  | Y                    | Model was adjusted for demographic variables (age, race, sex, year of listing) as well as a stepwise fit of all variables shown to be significantly associated with survival in previous studies. In addition, they also fitted access complications and claims for HCV at the time of listing. | Long term survival advantage was greater with DHCV+ Tx compared to dialysis on univariate analysis.<br><br>HR: 0.76 (0.60 to 0.96; P < 0.03)<br><br>Benefit was not seen in adjusted analysis because of significant confounding of allocation of DHCV+ kidneys.                                                                                                                                                                                                                                                                                                                                                                                                                                                                                                                                                                     |
| <b>Gibney et al. (2004)</b>     | USA           | Kaplan–Meier Estimator and log-rank tests      | NR                          | NA                | NA                                                        | N                    | NA                                                                                                                                                                                                                                                                                              | Despite suboptimal outcomes in graft survival and frequent occurrence of early graft loss, for patients with SS there the long-term survival advantage was greater with DTx compared to dialysis.<br><br>Long term survival advantage was greater with Tx compared to dialysis.                                                                                                                                                                                                                                                                                                                                                                                                                                                                                                                                                      |
| <b>Oniscu et al. (2004)</b>     | UK (Scotland) | Time-dependent Cox regression model            | N                           | Listing on WL     | Death, unavailable for follow-up or end of study period.  | Y                    | Age, gender, social deprivation, primary renal disease, distance from patient's home to transplant centre, and time on dialysis pre-listing                                                                                                                                                     | 0-30d survival was greater for Dx<br>RR: <b>4.91 (2.09 to 11.52; P &gt; 0.05)</b><br>RR: <b>5.03 (1.43 to 17.73; P &gt; 0.05) – Patients with comorbidity data (60%)</b><br><br>1 year survival was greater for Tx<br>RR: 0.35 (0.22 to 0.54; P < 0.05)<br>RR: 0.27 (0.14 to 0.52; P < 0.05) – Patients with comorbidity data                                                                                                                                                                                                                                                                                                                                                                                                                                                                                                        |

| Author and year             | Country       | Statistical analysis type                                                                                                                                                                                                                                                                     | Intention to treat approach | Start of analysis                                                     | End of analysis                                                                                                                  | Adjusted model (Y/N) | Covariates in fully adjusted model                                                                                                                                                                                                                                                                                          | Detailed Outcomes                                                                                                                                                                                                                                                                                                                                                                                                                                                                                                                                                                                                                                                                                                                                                                                                                                                                           |
|-----------------------------|---------------|-----------------------------------------------------------------------------------------------------------------------------------------------------------------------------------------------------------------------------------------------------------------------------------------------|-----------------------------|-----------------------------------------------------------------------|----------------------------------------------------------------------------------------------------------------------------------|----------------------|-----------------------------------------------------------------------------------------------------------------------------------------------------------------------------------------------------------------------------------------------------------------------------------------------------------------------------|---------------------------------------------------------------------------------------------------------------------------------------------------------------------------------------------------------------------------------------------------------------------------------------------------------------------------------------------------------------------------------------------------------------------------------------------------------------------------------------------------------------------------------------------------------------------------------------------------------------------------------------------------------------------------------------------------------------------------------------------------------------------------------------------------------------------------------------------------------------------------------------------|
|                             |               |                                                                                                                                                                                                                                                                                               |                             |                                                                       |                                                                                                                                  |                      |                                                                                                                                                                                                                                                                                                                             | (60%)                                                                                                                                                                                                                                                                                                                                                                                                                                                                                                                                                                                                                                                                                                                                                                                                                                                                                       |
| <i>Gill et al. (2005)</i>   | USA           | Time-dependent Cox regression model                                                                                                                                                                                                                                                           | Y                           | Listing on WL                                                         | Death or end up study follow-up                                                                                                  | Y                    | Age, gender, race, cause of end-stage kidney disease, comorbid conditions defined at the time of dialysis initiation (ischemic heart disease, congestive heart failure, stroke, peripheral vascular disease), duration of dialysis exposure prior to transplantation, and year of placement on the transplant waiting list. | Long term survival advantage was greater with Tx compared to dialysis.<br>RR >1-year after transplantation versus remaining on dialysis:<br>0.49 – pre-emptive Tx<br>0.43 – 1 year waiting time<br>0.38 – 2 year waiting time<br>0.34 – 3 year waiting time                                                                                                                                                                                                                                                                                                                                                                                                                                                                                                                                                                                                                                 |
| <i>Merion et al. (2005)</i> | USA           | Time-dependent Cox regression model                                                                                                                                                                                                                                                           | Y                           | Listing on WL or date of first dialysis therapy, whichever came first | survival time at risk was censored at the time of living-donor transplantation, wait listing for another organ, or end of study. | Y                    | Age, sex, race, ethnicity, blood type, ESRD cause, panel reactive antibody values, dialysis modality, comorbid conditions present at wait-listing year, donation service area for the organ procurement organization (OPO) of candidate registration, and time from dialysis to wait-listing.                               | Long term survival advantage was greater with Tx (SCD or ECD) compared to dialysis.<br>3 year:<br>RR: 0.28 (0.27 to 0.30; P < 0.001) – SCD<br>RR: 0.40 (0.37 to 0.44; P < 0.001) – ECD<br>Patients with diabetes, hypertensive nephrosclerosis, and older candidates had the largest survival benefit.<br>Cumulative survival with ECD took 3.5 years post-transplantation to equal that of standard-therapy patients (SCD and wait-listed dialysis).                                                                                                                                                                                                                                                                                                                                                                                                                                       |
| <i>Oniscu et al. (2005)</i> | UK (Scotland) | Time-dependent Cox regression model (adjusted for demographic variables in model 1 and for demographic and co-morbidity variables in model 2). Also performed subsequent analysis in which censoring was done at graft failure and was considered towards the follow-up in the dialysis group | Y                           | Listing on WL                                                         | Death, latest available follow-up or end of study period.                                                                        | Y                    | Age, gender, primary renal disease, social deprivation, time since waitlisting (model 1), and comorbidity (model 2)                                                                                                                                                                                                         | Long term survival advantage was greater with Tx compared to dialysis. Benefit was present in all patients undergoing transplantation, irrespective of their age group or primary renal disease.<br>0-30 day<br>RR: 1.35 (0.63 to 2.86) – No comorbidity adjustment<br>RR: 0.91 (0.22 to 3.70) – Comorbidity adjusted<br>RR: 1.82 (0.22 to 14.80) – Multisystem disease<br>RR: 1.28 (0.17 to 9.83) – Diabetes<br>RR: 2.38 (0.27 to 20.84) – >65 yr<br>>1 year:<br>RR: 0.32 (0.25 to 0.40; P < 0.001) – No comorbidity adjustment<br>RR: 0.28 (0.20 to 0.39; P < 0.001) – Comorbidity adjusted<br>RR: 0.16 (0.07 to 0.39; P < 0.05) – Glomerulonephritis<br>RR: 0.28 (0.13 to 0.61; P < 0.05) – Interstitial nephritis<br>RR: 0.13 (0.04 to 0.38; P < 0.05) – Multisystem disease<br>RR: 0.33 (0.15 to 0.74; P < 0.05) – Diabetes<br>RR: 0.34 (0.14 to 0.83; P < 0.05) – >65 yr<br>1.5 year: |



| Author and year               | Country        | Statistical analysis type                                                                                                                   | Intention to treat approach | Start of analysis                                                     | End of analysis                 | Adjusted model (Y/N) | Covariates in fully adjusted model                                                                                                                                                             | Detailed Outcomes                                                                                                                                                                                                                                                                                                                                                                                                                                                                                                                                                                                                                          |
|-------------------------------|----------------|---------------------------------------------------------------------------------------------------------------------------------------------|-----------------------------|-----------------------------------------------------------------------|---------------------------------|----------------------|------------------------------------------------------------------------------------------------------------------------------------------------------------------------------------------------|--------------------------------------------------------------------------------------------------------------------------------------------------------------------------------------------------------------------------------------------------------------------------------------------------------------------------------------------------------------------------------------------------------------------------------------------------------------------------------------------------------------------------------------------------------------------------------------------------------------------------------------------|
|                               |                |                                                                                                                                             |                             |                                                                       |                                 |                      |                                                                                                                                                                                                | RR: 0.18 (0.08 to 0.42; P < 0.001)                                                                                                                                                                                                                                                                                                                                                                                                                                                                                                                                                                                                         |
| <b>Snyder et al. (2006)</b>   | USA            | Time-dependent Cox regression model in patients with and without diabetes separately with PAD                                               | Y                           | NR                                                                    | NR                              | Y                    | Age, gender, race, ethnicity, BMI, primary ESRD cause, baseline comorbidities and time on RRT                                                                                                  | Long term survival advantage was greater with Tx compared to dialysis.<br>3 year:<br>RR: 0.36 (0.31 to 0.41; P < 0.001) – DM PAD+<br>RR: 0.57 (0.52 to 0.62; P < 0.001) – DM PAD-<br>RR: 0.47 (0.40 to 0.56; P < 0.001) – nDM PAD+<br>RR: 0.73 (0.68 to 0.79; P < 0.001) – nDM PAD-                                                                                                                                                                                                                                                                                                                                                        |
| <b>Gill et al. (2007)</b>     | USA            | Unadjusted death rates were determined in 3-month intervals during periods of waitlisting, allograft function, and after allograft failure. | NA                          | NA                                                                    | NA                              | N                    | NA                                                                                                                                                                                             | Long term survival advantage was greater with Tx compared to dialysis.                                                                                                                                                                                                                                                                                                                                                                                                                                                                                                                                                                     |
| <b>Rao et al. (2007)</b>      | USA            | Time-dependent Cox regression model                                                                                                         | Y                           | Listing on WL or date of first dialysis therapy, whichever came first | NR                              | Y                    | Age, sex, race, ethnicity, panel, reactive antibody level, diagnosis, dialysis modality, donation service area, and time from initiation of dialysis until first placement on the waiting list | Long term survival advantage was greater with Tx compared to dialysis. Benefit was most striking for patients with ESRD caused by diabetes and/or hypertension.<br>HR: 0.59 (0.53 to 0.65; P < 0.001) – All (70+ yr)<br>HR: 0.58 (0.52 to 0.65; P < 0.001) – HR: Age 70-74 yr<br>HR: 0.67 (0.53 to 0.86; P < 0.05) – Age 75+ yr<br>HR: 0.75 (0.65 to 0.86; P < 0.001) - ECD<br>HR: 0.43 (0.33 to 0.57; P < 0.001) – LTx<br><b>HR: 0.89 (0.64 to 1.22; ns) – Glomerulonephritis</b><br>HR: 0.53 (0.41 to 0.68; P < 0.001) – Diabetes<br>HR: 0.56 (0.45 to 0.68; P < 0.001) – Hypertension<br>HR: 0.49 (0.39 to 0.61; P < 0.05) – Other ESRD |
| <b>Savoie et al. (2007)</b>   | France         | Kaplan–Meier Estimator and log-rank tests / Time-dependent Cox regression model                                                             | Y                           | NR                                                                    | NR                              | Y                    | Age, peak panel reactive antibody level, initial cause of ESRD, blood group, and time on dialysis before registration                                                                          | Long term survival advantage was greater with Tx (SCD or ECD) compared to dialysis.<br>Adjusted HR of death for remaining on dialysis vs receiving a transplant:<br>HR: 2.59 (2.08 to 3.21; P < 0.001) – Overall (ECD and SCD)<br>HR: 3.96 (2.84 to 5.51; P < 0.001) – Overall (SCD)<br>HR: 2.25 (1.80 to 2.81; P < 0.001) – Overall (ECD)                                                                                                                                                                                                                                                                                                 |
| <b>Sorensen et al. (2007)</b> | Denmark        | Cox proportional hazard regression model                                                                                                    | Y                           | Listing on WL                                                         | NR                              | Y                    | Age, sex, diabetes, waiting list status, transplantation, and time period                                                                                                                      | Long term survival advantage was greater with Tx (DTx or LTx) compared to dialysis.<br>HR: 0.21 (0.13 to 0.34; P < 0.001)                                                                                                                                                                                                                                                                                                                                                                                                                                                                                                                  |
| <b>Patel et al. (2008)</b>    | UK (Scotland)  | Kaplan–Meier Estimator and log-rank tests / Cox proportional hazard regression model                                                        | NR                          | NR                                                                    | NR                              | N                    | NA                                                                                                                                                                                             | Long term survival advantage was greater with Tx (DTx or LTx) compared to dialysis.<br>Mean survival Tx = 4.5 ± 0.6 years<br>Mean survival WL = 4.1 ± 1.4 years                                                                                                                                                                                                                                                                                                                                                                                                                                                                            |
| <b>Pauly et al. (2009)</b>    | USA and Canada | Kaplan–Meier Estimator and log-rank tests / Cox proportional hazard regression model                                                        | NR                          | Date of first treatment (either Nocturnal                             | Death or end up study follow-up | Y                    | Age at NHD start or transplantation, gender, history of ischaemic heart disease/peripheral vascular disease/cancer, study year                                                                 | No difference in the adjusted survival of ESRD patients treated with nocturnal HD and DTx. Conversely, recipients of LTx demonstrated the best survival benefit.<br><b>HR: 0.87 (0.50 to 1.51; P = 0.61) – SCD</b>                                                                                                                                                                                                                                                                                                                                                                                                                         |

| Author and year                 | Country      | Statistical analysis type                                                                                                                                                                                                                                                                               | Intention to treat approach | Start of analysis                                         | End of analysis                                              | Adjusted model (Y/N) | Covariates in fully adjusted model                                                                                                                                        | Detailed Outcomes                                                                                                                                                                                                                                                                                                                    |
|---------------------------------|--------------|---------------------------------------------------------------------------------------------------------------------------------------------------------------------------------------------------------------------------------------------------------------------------------------------------------|-----------------------------|-----------------------------------------------------------|--------------------------------------------------------------|----------------------|---------------------------------------------------------------------------------------------------------------------------------------------------------------------------|--------------------------------------------------------------------------------------------------------------------------------------------------------------------------------------------------------------------------------------------------------------------------------------------------------------------------------------|
|                                 |              |                                                                                                                                                                                                                                                                                                         |                             | HD/DTx/LTx)                                               |                                                              |                      | and duration of conventional dialysis treatment prior to treatment with treatment modality of interest.                                                                   | HR: 0.51 (0.28 to 0.91; P = 0.02) – LTx                                                                                                                                                                                                                                                                                              |
| <b>Heldal et al. (2010)</b>     | Norway       | Kaplan–Meier Estimator / Time-dependent Cox regression model                                                                                                                                                                                                                                            | Y                           | Listing on WL or start of dialysis (whichever was latest) | Death or end of study period.                                | Y                    | Age, sex, primary kidney disease, type of centre (university vs not university hospital), time on dialysis before waitlisting, and dialysis modality.                     | Long term survival advantage in elderly patients was greater with Tx compared to dialysis.<br>HR: 0.78 (0.52 to 1.18, P = 0.25) – Overall<br>Start time of dialysis era:<br>HR: 1.01 (0.58 to 1.75) – 1990-1994<br>HR: 0.40 (0.19 to 0.83; P = 0.01) – 2000-2005                                                                     |
| <b>Kumar et al. (2011)</b>      | UK (England) | Kaplan–Meier Estimator and log rank test                                                                                                                                                                                                                                                                | NR                          | NA                                                        | NA                                                           | N                    | NA                                                                                                                                                                        | Long term survival advantage was greater with Tx compared to dialysis.<br>Survival at 1 and 3 years after angiogram was 100% and 97.2% and for dialysis patients it was 94.9% and 80.7% at 1 and 3 years, respectively.                                                                                                              |
| <b>Bisigniano et al. (2012)</b> | Argentina    | Time-dependent Cox regression model                                                                                                                                                                                                                                                                     | NR                          | Listing on WL                                             | Death, latest available follow-up or end of study period.    | Y                    | Age, gender, ischemia (< or >24hr), time on dialysis (< or >7yrs), primary cause of ESRD, and donor cause of death                                                        | 0–30 days survival was greater for Dx<br>HR: 4.18 (2.88 to 6.06; P < 0.001)<br>>1 year survival was greater for Tx<br>HR: 0.19 (0.12 to 0.29; P < 0.001)                                                                                                                                                                             |
| <b>De Lima et al. (2012)</b>    | Brazil       | Kaplan–Meier Estimator and log rank test                                                                                                                                                                                                                                                                |                             | –                                                         | –                                                            | N                    | NA                                                                                                                                                                        | Benefit of transplantation was mainly restricted to the elderly and to patients with diabetes and/or CVD, defined by the American Society of Transplantation as high-risk patients. <b>Low-risk patients did well either on dialysis or Tx so that no discernible advantage.</b>                                                     |
| <b>Bouaoun et al. (2013)</b>    | France       | Used Lexis diagrams to analyse two-time scales: time since ESRD onset and time since waitlisting, both until transplantation or end of follow-up. Crude death rates were computed for each period by dividing the number of deaths by the time spent in each status and expressed per 100 person-years. | NR                          | NA                                                        | NA                                                           | N                    | NA                                                                                                                                                                        | Long term survival advantage in patients was greater with Tx compared to dialysis.                                                                                                                                                                                                                                                   |
| <b>Gill et al. (2013)</b>       | USA          | Time-dependent Cox regression model                                                                                                                                                                                                                                                                     | Y                           | Listing on WL                                             | Death, delisting, and end of study period                    | Y                    | Age, gender, race, primary cause of ESRD, and year of wait listing                                                                                                        | Long term survival advantage in patients was greater with Tx (DTx, LTx, or ECD) compared to dialysis.<br>In patients with low and intermediate cardiovascular risk, LTx transplantation was associated with almost an immediate survival advantage.                                                                                  |
| <b>Schold et al. (2014)</b>     | USA          | Time-dependent Cox regression model                                                                                                                                                                                                                                                                     | Y                           | Listing on WL                                             | Censored at time of living transplantation or last follow-up | Y                    | Age, BMI, race, sex, insurance status, panel reactive antibody level, educational attainment, active versus inactive status, time on dialysis, and primary cause of ESRD. | Long term survival advantage in patients was greater with Tx compared to dialysis. This was found to be true regardless of treatment centre performance.<br>HR: 0.32 (0.31 to 0.32) – Overall<br>HR: 0.23 (0.20 to 0.25) – centres with higher-than-expected outcomes<br>HR: 0.30 (0.30 to 0.31) – centres with as-expected outcomes |

| Author and year          | Country | Statistical analysis type                                                                                  | Intention to treat approach | Start of analysis                                                           | End of analysis                                           | Adjusted model (Y/N) | Covariates in fully adjusted model                                                                                                                                                                                                                                                                               | Detailed Outcomes                                                                                                                                                                                                                                                                                                                                                                                                                                                                                                                                                                                                                                                                                                                                                                                                                                                                                                  |
|--------------------------|---------|------------------------------------------------------------------------------------------------------------|-----------------------------|-----------------------------------------------------------------------------|-----------------------------------------------------------|----------------------|------------------------------------------------------------------------------------------------------------------------------------------------------------------------------------------------------------------------------------------------------------------------------------------------------------------|--------------------------------------------------------------------------------------------------------------------------------------------------------------------------------------------------------------------------------------------------------------------------------------------------------------------------------------------------------------------------------------------------------------------------------------------------------------------------------------------------------------------------------------------------------------------------------------------------------------------------------------------------------------------------------------------------------------------------------------------------------------------------------------------------------------------------------------------------------------------------------------------------------------------|
| Lloveras et al. (2015)   | Spain   | Kaplan–Meier Estimator and log-rank tests / Cox proportional hazard regression model (clustering by pairs) | NR                          | Date of transplant (Tx group) or date of equal dialysis time (for WL group) | Death, unavailable for follow-up or end of study period.  | Y                    | Age, sex, primary cause of ESRD, HCV+ status, donor age, chronic liver and respiratory diseases, malignant tumours, and DM                                                                                                                                                                                       | Long term survival advantage in patients was greater with Tx (donor ≥65y) compared to dialysis.<br><br>HR of remaining on dialysis vs receiving a Tx: HR: 2.66 (2.21 to 3.20; P < 0.001)                                                                                                                                                                                                                                                                                                                                                                                                                                                                                                                                                                                                                                                                                                                           |
| Brar et al. (2016)       | USA     | Time-dependent Cox regression model                                                                        | Y                           | Listing on WL                                                               | Death, latest available follow-up or end of study period. | Y                    | Hypercholesterolemia, CVA, IHD, HTN, DM, gender, history of amputation, and age at listing, time on dialysis from WL to transplantation.                                                                                                                                                                         | Long term survival advantage in PAD patients was greater with LTx compared to dialysis. DTx did not offer a survival advantage over dialysis for PAD patients.<br><br>≤ 100 days<br>RR: 2.36 (1.67 to 3.32; P < 0.001) – CTx<br>RR: 0.93 (0.50 to 1.71; P = 0.81) – LTx<br><br>>1 year<br>RR: 1.17 (0.84 to 1.64; P = 0.36) – DTx<br>RR: 0.35 (0.22 to 0.57; P < 0.001) – LTx                                                                                                                                                                                                                                                                                                                                                                                                                                                                                                                                      |
| Cassuto et al. (2016)    | USA     | Kaplan–Meier Estimator and log-rank tests / Time-dependent (discrete) Cox regression model                 |                             | Listing on WL                                                               | Death, latest available follow-up or end of study period. | Y                    | Age, race, gender, dialysis status at time of transplant, primary cause of ESRD, CAD, and PAD. Donor characteristics included age, CIT, and donor quality.                                                                                                                                                       | Long term survival advantage in PAD patients was greater with Tx (SCD, LTx, or ECD) compared to dialysis. LTx was associated with the greatest post-transplant survival benefit.<br><br>3-year survival:<br>HR: 0.89 (0.74 to 0.99; p = 0.04 – ECD<br>HR: 0.52 (0.47 to 0.58; p < 0.01) – SCD<br>HR: 0.31 (0.26 to 0.37; p < 0.01) – LTx<br><br>5-year survival:<br>HR: 0.469 (0.435-0.504; P < 0.001)                                                                                                                                                                                                                                                                                                                                                                                                                                                                                                             |
| Perez-Saez et al. (2016) | Spain   | Time-dependent Cox regression model                                                                        | Y                           | Listing on WL                                                               | Death                                                     | Y                    | Age, sex, waitlist period (before or after 2000), primary cause of ESRD, having at least one of five cardiovascular comorbidities (IHD, cardiac failure, cardiac conduction disorders, CVA, PVD), having a chronic respiratory disease, and time from first treatment for ESRD to placement on the waiting list. | Long term survival advantage in patients was greater with Tx (donor ≥75y) compared to dialysis.<br><br>HR: 0.44 (0.32 to 0.61; P < 0.001) – Overall<br>HR: 0.17 (0.06 to 0.48; P < 0.001) – <65 years<br>HR: 0.56 (0.34 to 0.92; P = 0.02) – 65-69 years<br>HR: 0.81 (0.52 to 1.28; P = 0.39) – ≥70 years<br>HR: 0.46 (0.32 to 0.64; P < 0.001) – non-diabetic cause of ESRD<br>HR: 0.33 (0.09 to 1.14; P = 0.08) – ESRD-DM<br>HR: 0.53 (0.36 to 0.78; P = 0.001) – No cardiovascular co-morbidities<br>HR: 0.31 (0.16 to 0.60; P = 0.001) – Cardiovascular co-morbidities<br>HR: 0.46 (0.33 to 0.66; P < 0.001) – No DM<br>HR: 0.35 (0.14 to 0.88; P = 0.03) – DM<br>HR: 0.44 (0.31 to 0.63; P = 0.001) – No COPD<br>HR: 0.45 (0.17 to 1.24; P = 0.001) – COPD<br><br>Survival benefit lost its significance in recipients whose ESRD cause was diabetes mellitus (HR 0.33, 95% CI 0.09–1.15), in recipients with |

| Author and year               | Country | Statistical analysis type           | Intention to treat approach | Start of analysis | End of analysis                                           | Adjusted model (Y/N) | Covariates in fully adjusted model                                                                                                                                                                                                         | Detailed Outcomes                                                                                                                                                                                                                                                                                                                                                                                                                                                                                                                                                                                                               |
|-------------------------------|---------|-------------------------------------|-----------------------------|-------------------|-----------------------------------------------------------|----------------------|--------------------------------------------------------------------------------------------------------------------------------------------------------------------------------------------------------------------------------------------|---------------------------------------------------------------------------------------------------------------------------------------------------------------------------------------------------------------------------------------------------------------------------------------------------------------------------------------------------------------------------------------------------------------------------------------------------------------------------------------------------------------------------------------------------------------------------------------------------------------------------------|
|                               |         |                                     |                             |                   |                                                           |                      |                                                                                                                                                                                                                                            | chronic obstructive pulmonary disease (HR 0.46, 95% CI 0.17 to 1.27) and in those aged $\geq 70$ years (HR 0.82, 95% CI 0.52 to 1.28).<br>Long term survival advantage in elderly patients and those with high co-morbidity was greater with Tx (DTx or LTx) compared to dialysis.                                                                                                                                                                                                                                                                                                                                              |
| <i>Sorensen et al. (2016)</i> | Denmark | Time-dependent Cox regression model | Y                           | Listing on WL     | NR                                                        | Y                    | Age, sex, renal diagnosis, time on dialysis before entering the WL, and CCI                                                                                                                                                                | HR: 0.3 (0.23 to 0.39) – LTx<br>HR: 0.38 (0.32 to 0.45) – DTx                                                                                                                                                                                                                                                                                                                                                                                                                                                                                                                                                                   |
| <i>Kaballo et al. (2018)</i>  | Ireland | Time-dependent Cox regression model | Y                           | Listing on WL     | Death, latest available follow-up or end of study period. | Y                    | Age, sex, cause of ESRD, year of placement on the waiting list, and time from first ESRD to placement on the waiting list.                                                                                                                 | Long term survival advantage in patients was greater with Tx compared to dialysis.<br>5-year mortality risk:<br>RR: 0.53 (0.37 to 0.77; P = 0.001)                                                                                                                                                                                                                                                                                                                                                                                                                                                                              |
| <i>Legeai et al. (2018)</i>   | France  | Time-dependent Cox regression model | NR                          | Listing on WL     | Death, unavailable for follow-up or end of study period.  | Y                    | Age, gender, number of cardiovascular comorbidities, mobility status, diabetes, and time on dialysis at inclusion.                                                                                                                         | Although risk with Tx had halved by 9 months compared to first 3 months, the perioperative risk was still not offset by month 36.<br>Transplantation did not appear to provide statistical survival benefit for patients without cardiovascular comorbidity or diabetes.<br><b>HR: 3.0 (1.9 to 4.8; P &lt; 0.001) – 0-3 months</b><br>HR: 0.5 (0.3 to 1.0; P = 0.05) – 24-36 months<br><b>HR: 0.9 (0.5 to 1.6; P = 0.65) – &gt;3 years</b>                                                                                                                                                                                      |
| <i>Clark et al. (2019)</i>    | USA     | Time-dependent Cox regression model | Y                           | Listing on WL     | Death, latest available follow-up or end of study period. | Y                    | Age at waitlisting, sex, race, cause of ESKD, BMI, year of waitlisting, comorbid conditions, insurance type, and employment status                                                                                                         | Long term survival advantage in patients was greater with Tx compared to dialysis.<br>1-year:<br>HR: 0.40 (0.39 to 0.41; P < 0.001)                                                                                                                                                                                                                                                                                                                                                                                                                                                                                             |
| <i>Sawinski et al. (2019)</i> | USA     | Time-dependent Cox regression model | Y                           | Listing on WL     | Death, delisting, and end of study period                 | Y                    | Age, sex, race, diabetes, CVD, severe liver disease, insurance, income, panel-reactive antibody, dialysis vintage, BMI, dialysis modality, year of waitlisting interacted with time, haemoglobin level, platelet count, and albumin level. | Long term survival advantage in patients was greater with Tx (HCV-ve or HCV+ve donor) compared to dialysis.<br>Survival benefit was achieved at 9 months and 2 years for HCV-ve and HCV+ve donor Tx, respectively.<br>3 years:<br>HR: 0.42 (0.27 to 0.63) – (seropositive and seronegative donors)<br>HR: 0.42 (0.25 to 0.72) – (seronegative donors)<br>HR: 0.52 (0.30 to 0.93) – (seropositive donors)                                                                                                                                                                                                                        |
| <i>Arcos et al. (2020)</i>    | Spain   | Time-dependent Cox regression model | Y                           | Listing on WL     | Death, unavailable for follow-up or end of study period.  | Y                    | Age, gender, period of time (only for donors between 60 and 79 y), ESRD-DM, having at least 1 of 5 cardiovascular comorbidities (IHD, cardiac failure, cardiac conduction disorders, CVA and PVD), and chronic respiratory disease.        | >1 year survival was greater for Tx<br>HR: 0.46 (0.39-0.55; P < 0.001)<br>HR of Tx vs dialysis on WL at 12m (donors 60-79yr):<br>HR: 0.50 (0.44 to 0.58; P = 0.02) – Global<br>HR: 0.45 (0.38 to 0.52; P < 0.001) – <70y<br>HR: 0.68 (0.51 to 0.90; P < 0.001) – $\geq 70y$<br>HR: 0.51 (0.42 to 0.62; P < 0.001) – No cardiovascular<br>HR: 0.49 (0.39 to 0.61; P < 0.001) – Any Cardiovascular<br>HR: 0.47 (0.40 to 0.55; P < 0.001) – No diabetes as PRD<br>HR: 0.67 (0.47 to 0.94; P < 0.001) – Diabetes as PRD<br>Risk of Tx vs dialysis on WL at 12m (donors $\geq 80y$ ):<br>HR: 0.54 (0.38 to 0.77; P = 0.001) – Global |

| Author and year               | Country   | Statistical analysis type                                                                                                                                                                                                                                                                                                                                                                                                 | Intention to treat approach | Start of analysis                                                                             | End of analysis                                          | Adjusted model (Y/N) | Covariates in fully adjusted model        | Detailed Outcomes                                                                                                                                                                                                                                                                                                                  |
|-------------------------------|-----------|---------------------------------------------------------------------------------------------------------------------------------------------------------------------------------------------------------------------------------------------------------------------------------------------------------------------------------------------------------------------------------------------------------------------------|-----------------------------|-----------------------------------------------------------------------------------------------|----------------------------------------------------------|----------------------|-------------------------------------------|------------------------------------------------------------------------------------------------------------------------------------------------------------------------------------------------------------------------------------------------------------------------------------------------------------------------------------|
|                               |           |                                                                                                                                                                                                                                                                                                                                                                                                                           |                             |                                                                                               |                                                          |                      |                                           | HR: 0.48 (0.30 to 0.76; P = 0.002) – <70y<br>HR: <b>0.68 (0.39 to 1.16; P = 0.15)</b> – ≥70y<br>HR: 0.54 (0.35 to 0.83; P = 0.005) – No cardiovascular<br>HR: 0.51 (0.28 to 0.91; P = 0.02) – Any Cardiovascular<br>HR: 0.56 (0.38 to 0.82; P = 0.003) – No diabetes as PRD<br>HR: 0.43 (0.17 to 1.09; P = 0.08) – Diabetes as PRD |
| <b>Fragale et al., 2020</b>   | Argentina | Kaplan–Meier Estimator and log-rank tests / Cox proportional hazard regression model                                                                                                                                                                                                                                                                                                                                      | Y                           | NR                                                                                            | NR                                                       | NR                   | NR                                        | Long term survival advantage in patients older than 60 was greater with Tx compared to dialysis. Benefit was independent of degree of comorbidities present at inclusion on the WL.<br><br>HR: 0.35 (0.27 to 0.45; P < 0.001)<br>HR: 1.62 (1.09 to 2.41; P < 0.02) – CCI ≥ 3 versus CCI score ≤3                                   |
| <b>Lenain et al., 2020</b>    | France    | Time -dependent propensity score matching (using nearest neighbour calliper matching). To emulate a 1:1 randomized trial, they performed random matching without replacement. They then obtained patient survival was through Kaplan-Meier estimator, computed the number needed to treat as the inverse of the absolute reduction risk, and finally they computed a proportional hazard model in the matched sub-cohort. | Y                           | Listing on WL or date of first dialysis therapy if patients entered WL without prior dialysis | Death, unavailable for follow-up or end of study period. | Y                    | NR                                        | Long term survival advantage in patients was greater with Tx compared to dialysis.<br><br>For every 13 transplantations, one life was saved.                                                                                                                                                                                       |
| <b>Hellemans et al., 2021</b> | Belgium   | Used Cox regression to calculate mortality during the median waiting time, with waiting time for both the transplanted and non-transplanted patients based on a competing risk analysis. They added the result to the 3-year mortality risk after transplantation and compared that outcome to an equal amount of time (median waiting time of 3 years) in the dialysis control group.                                    | Y                           | Date of active waitlisted dialysis                                                            | Death, unavailable for follow-up or end of study period. | Y                    | Age (20-44, 45-64, ≥65), sex, and ESRD-DM | Long term survival advantage in patients was greater with Tx (SCD or ECD) compared to dialysis.<br><br>Although for elderly patients ECD for were associated with a minimal benefit.                                                                                                                                               |

**Supplementary Table E.** Leave-one-out meta-analysis for long term all-cause mortality for transplantation versus dialysis.

| <b>Author, year</b>                          | <b>Estimate</b> | <b>Z value</b> | <b>P value</b> | <b>95% CI</b>    | <b>I<sup>2</sup> (%)</b> | <b>Q</b> | <b>Q (P value)</b> |
|----------------------------------------------|-----------------|----------------|----------------|------------------|--------------------------|----------|--------------------|
| Fragale et al. 2020                          | 0.4644          | -8.45          | <0.001         | 0.3887 to 0.5548 | 95.5                     | 399.31   | <0.001             |
| McDonald et al. 2002                         | 0.4793          | -9.31          | <0.001         | 0.4106 to 0.5596 | 93.8                     | 290.07   | <0.001             |
| De Lima et al. 2012 (Low Risk)               | 0.4364          | -9.83          | <0.001         | 0.3699 to 0.5149 | 95.4                     | 390.57   | <0.001             |
| De Lima et al. 2012 (High Risk)              | 0.4435          | -9.41          | <0.001         | 0.3745 to 0.5253 | 95.4                     | 394.40   | <0.001             |
| De Lima et al. 2012 (Low Risk and High Risk) | 0.4250          | -9.88          | <0.001         | 0.3586 to 0.5037 | 95.5                     | 380.40   | <0.001             |
| Rabbat et al. 2000                           | 0.4652          | -8.92          | <0.001         | 0.3932 to 0.5505 | 95.5                     | 401.54   | <0.001             |
| Sorensen et al. 2016 (DTx)                   | 0.4608          | -8.68          | <0.001         | 0.3869 to 0.5489 | 95.5                     | 403.95   | <0.001             |
| Sorensen et al. 2016 (LTx)                   | 0.4662          | -8.75          | <0.001         | 0.3930 to 0.5532 | 95.5                     | 399.46   | <0.001             |
| Sorensen et al. 2016 (DTx and LTx)           | 0.4746          | -8.03          | <0.001         | 0.3956 to 0.5693 | 95.7                     | 398.84   | <0.001             |
| Lenain et al. 2021                           | 0.4746          | -8.03          | <0.001         | 0.3956 to 0.5693 | 95.7                     | 398.84   | <0.001             |
| Brunkhorst et al. 2003                       | 0.4540          | -9.12          | <0.001         | 0.3831 to 0.5379 | 95.5                     | 404.23   | <0.001             |
| Kalo et al. 2001                             | 0.4451          | -9.43          | <0.001         | 0.3762 to 0.5266 | 95.5                     | 399.80   | <0.001             |
| Kaballo et al. 2018                          | 0.4499          | -9.10          | <0.001         | 0.3788 to 0.5344 | 95.5                     | 399.84   | <0.001             |
| Segoloni et al. 1998                         | 0.4347          | -9.83          | <0.001         | 0.3681 to 0.5133 | 95.3                     | 385.56   | <0.001             |
| Straathof-Galema et al. 2001                 | 0.4479          | -9.48          | <0.001         | 0.3794 to 0.5288 | 95.5                     | 401.98   | <0.001             |
| Fauchald et al. 1988                         | 0.4674          | -8.80          | <0.001         | 0.3946 to 0.5536 | 95.5                     | 399.63   | <0.001             |
| Heldal et al. 2010                           | 0.4462          | -9.45          | <0.001         | 0.3775 to 0.5275 | 95.5                     | 401.20   | <0.001             |
| Arcos et al. 2020                            | 0.4569          | -8.37          | <0.001         | 0.3804 to 0.5488 | 95.5                     | 398.81   | <0.001             |
| Medin et al. 2000                            | 0.4433          | -9.41          | <0.001         | 0.3742 to 0.5251 | 95.4                     | 392.89   | <0.001             |
| Oniscu et al. 2005                           | 0.4752          | -8.72          | <0.001         | 0.4020 to 0.5617 | 95.4                     | 389.93   | <0.001             |
| Patel et al. 2008                            | 0.4511          | -9.39          | <0.001         | 0.3820 to 0.5326 | 95.5                     | 403.74   | <0.001             |
| Clark et al. 2019                            | 0.4713          | -6.39          | <0.001         | 0.3741 to 0.5936 | 95.0                     | 363.13   | <0.001             |

**Supplementary Table F. Meta-regression analysis for potential confounders**

| Parameter                        | Studies | Test of Moderators   | R <sup>2</sup> (%) | β-Estimate | SE     | Z value | P value | 95% CI               |
|----------------------------------|---------|----------------------|--------------------|------------|--------|---------|---------|----------------------|
| Mean Age                         | 12      | 0.3685<br>(P = 0.54) | 0                  | -0.0071    | 0.0117 | -0.6071 | 0.54    | -0.0300 to<br>0.0158 |
| Maximum duration of follow-up    | 14      | 0.6496<br>(P = 0.40) | 0                  | -0.0126    | 0.0151 | -0.8334 | 0.40    | -0.0421 to<br>0.0170 |
| Median period of data collection | 15      | 0.0736<br>(P = 0.79) | 3.16               | 0.0028     | 0.0103 | 0.2713  | 0.79    | -0.0174 to<br>0.0230 |
